# Supplementary material for: Highly selective conversion of diols into aldehydes for the purification of ethylene glycol with a self-adjusting coupling reactor
Source: Royal Society of Chemistry journal article supplement (doi:10.1039/d3cy01771k), 2024-01-01
Supplement: d3cy01771k1.pdf [file d3cy01771k1.pdf]

## Supplementary Information

### Highly selective conversion of diols into aldehydes for the purification of ethylene glycol with a self-adjusting coupling reactor

Jianwei Ji <sup>a</sup>, Shuo Ai <sup>\*,b</sup>, Wanguo Yu <sup>b</sup>, Linghui Liu <sup>b</sup>, Chengdu Huang <sup>b</sup>

<sup>a</sup> School of Chemical & Environmental Science, Shaanxi University of Technology, Hanzhong 723001, China

<sup>b</sup> College of Biological and Chemical Engineering, Guangxi University of Science and Technology, Liuzhou 545006, China

Corresponding authors: Shuo Ai, Email address: 100001928@gxust.edu.cn

**Table S1.** Effect of reaction temperature on the coupled reactions.

**Table S2.** Effect of propanal dosage on the coupled reactions.

**Table S3.** Effect of water dosage on the coupled reactions.

**Table S4.** Product selectivity data in the stability test of catalyst.

**Table S1** Effect of reaction temperature on the coupled reactions<sup>a</sup>

| Temperature/<br>K | Conv. <sub>p</sub><br>DO (%) | Conv.<br>BDO<br>(%) | PDO-based selectivity (%) |         |      |      |          | BDO-based selectivity (%) |         |          |      | DEG<br>and<br>TEG<br>yield<br>(%) | EG<br>recovery<br>(%) |
|-------------------|------------------------------|---------------------|---------------------------|---------|------|------|----------|---------------------------|---------|----------|------|-----------------------------------|-----------------------|
|                   |                              |                     | propanal                  | acetone | EMD  | ED   | oligomer | butadiene                 | butanal | butanone | PD   |                                   |                       |
| 433               | 58.5                         | 63.7                | 11                        | 1.1     | 14.6 | 44.5 | 28.8     | 1.4                       | 77.8    | 7.2      | 13.7 | 2.8                               | 82.2                  |
| 453               | 81.6                         | 82.8                | 70.5                      | 1.3     | 2    | 8.7  | 17.4     | 2.6                       | 89.8    | 6.7      | 0.9  | 6.1                               | 84.6                  |

<sup>a</sup> Feedstock: 21.9 g of EG, 6 g of PDO, 2.1 g of BDO; 4-h reaction; dehydration conditions at 433 K: 2.6 g of H-Beta, 300 rpm; dehydration conditions at 453 K: 1.4 g of H-Beta, 300 rpm; Hydrolysis conditions: 0.2 g of Amberlyst-15, 350 K, 15 mL/min N<sub>2</sub>.

**Table S2** Effect of propanal dosage on the coupled reactions<sup>a</sup>

| Propanal<br>added (g) | Conv. <sub>P</sub><br>D <sub>0</sub> (%) | Conv. <sub>B</sub><br>D <sub>0</sub> (%) | PDO-based selectivity (%) |         |     |      |          | BDO-based selectivity (%) |         |          |     | DEG and<br>TEG<br>yield (%) | EG<br>recov<br>ery<br>(%) |
|-----------------------|------------------------------------------|------------------------------------------|---------------------------|---------|-----|------|----------|---------------------------|---------|----------|-----|-----------------------------|---------------------------|
|                       |                                          |                                          | propanal                  | acetone | EMD | ED   | oligomer | butadiene                 | butanal | butanone | PD  |                             |                           |
| 0                     | 79.6                                     | 81.2                                     | 75.6                      | 1.5     | 1.9 | 11.7 | 9.3      | 3.3                       | 84.6    | 10.7     | 1.4 | 5.1                         | 85.6                      |
| 0.5                   | 82                                       | 84.3                                     | 72.1                      | 1       | 6.3 | 12.6 | 8        | 2.8                       | 80.1    | 13.5     | 3.6 | 5.5                         | 83.4                      |

<sup>a</sup> Dehydration conditions: 21.9 g of EG, 6 g of PDO, 2.1 g of BDO, 1.4 g of H-Beta, 300 rpm, 4 h; Hydrolysis conditions: 0.2 g of Amberlyst-15, 350 K, 15 mL/min N<sub>2</sub>.

**Table S3** Effect of water dosage on the coupled reactions<sup>a</sup>

| Water added (g) | Conv. <sub>P</sub><br>D <sub>O</sub> (%) | Conv. <sub>B</sub><br>D <sub>O</sub> (%) | PDO-based selectivity (%) |         |     |      |          | BDO-based selectivity (%) |         |          |     | DEG and TEG yield (%) | EG recovery (%) |
|-----------------|------------------------------------------|------------------------------------------|---------------------------|---------|-----|------|----------|---------------------------|---------|----------|-----|-----------------------|-----------------|
|                 |                                          |                                          | propanal                  | acetone | EMD | ED   | oligomer | butadiene                 | butanal | butanone | PD  |                       |                 |
| 0               | 79.6                                     | 81.2                                     | 75.6                      | 1.5     | 1.9 | 11.7 | 9.3      | 3.3                       | 84.6    | 10.7     | 1.4 | 5.1                   | 85.6            |
| 2               | 82.2                                     | 85.7                                     | 76.6                      | 0.9     | 3.8 | 10.2 | 8.5      | 2.1                       | 82.8    | 12.1     | 3   | 5.9                   | 81.7            |

<sup>a</sup> Dehydration conditions: 21.9 g of EG, 6 g of PDO, 2.1 g of BDO, 1.4 g of H-Beta, 300 rpm, 4 h; Hydrolysis

conditions: 0.2 g of Amberlyst-15, 350 K, 15 mL/min N<sub>2</sub>.

**Table S4** Product selectivity data in the stability test of catalyst<sup>a</sup>

| Run | Conv.   | Conv.   | PDO-based selectivity (%) |         |     |     |          | BDO-based selectivity (%) |         |          |     | DEG and          | EG              |
|-----|---------|---------|---------------------------|---------|-----|-----|----------|---------------------------|---------|----------|-----|------------------|-----------------|
|     | PDO (%) | BDO (%) | propanal                  | acetone | EMD | ED  | oligomer | butadiene                 | butanal | butanone | PD  | TEG<br>yield (%) | recovery<br>(%) |
| 1   | 95.8    | 96.3    | 85.7                      | 1.3     | 1.7 | 7.3 | 4        | 1.4                       | 86.6    | 10.4     | 1.6 | 13.3             | 74.5            |
| 2   | 95.7    | 96.3    | 86.6                      | 1       | 1.5 | 7.4 | 3.4      | 1.9                       | 87.3    | 10.1     | 0.8 | 14.1             | 74              |
| 3   | 92.5    | 94.5    | 86.3                      | 1.2     | 2.2 | 6.7 | 3.6      | 2.1                       | 82.4    | 12.3     | 3.1 | 13.4             | 71.4            |
| 4   | 96      | 96.4    | 84.4                      | 1.3     | 1.9 | 8.4 | 4        | 1.4                       | 86.7    | 11       | 0.9 | 14               | 71.4            |
| 5   | 95.1    | 95.4    | 86.4                      | 1.3     | 1.6 | 7.4 | 3.3      | 1.6                       | 86.9    | 10.6     | 0.9 | 13.6             | 72.8            |

<sup>a</sup> Dehydration conditions: 21.9 g of EG, 6 g of PDO, 2.1 g of BDO, 1.8 g of H-Beta, 453 K, 300 rpm, 6 h; Hydrolysis conditions: 350 K, 0.3 g of Amberlyst-15, 15 mL/min N<sub>2</sub> in the last 2 h.
